# Supplementary material
Source: PubMed Central journal article supplement (PMC2597433)

**A.**

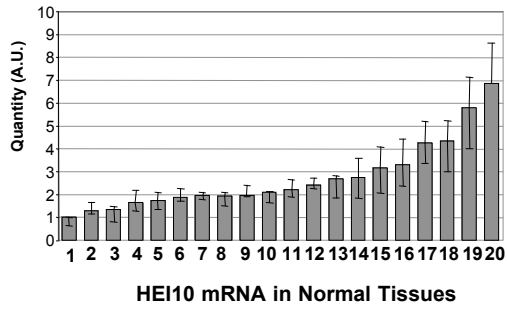

**B.**

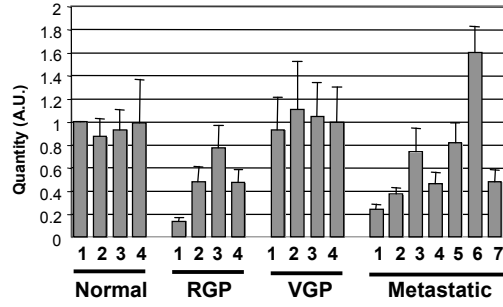

**C.**

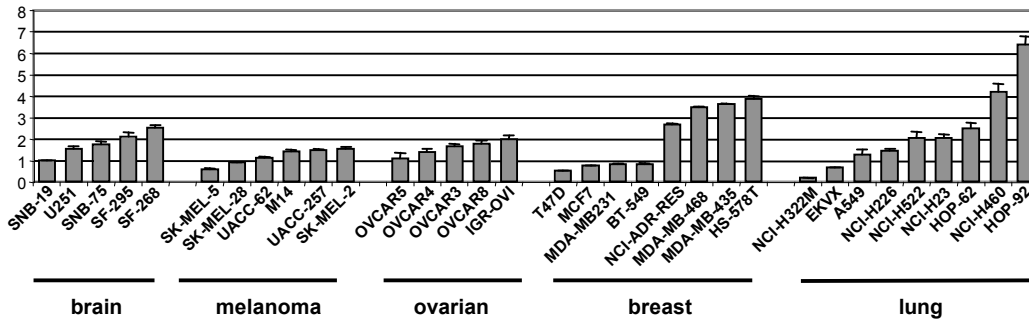

Supplement: NIHMS59712-supplement-Supp_Fig_1.pdf [file NIHMS59712-supplement-Supp_Fig_1.pdf]
